# Supplementary material for: Diagnostic value and clinical significance of circulating miR-650 and CA211 in detecting of gastric carcinoma
Source: PubMed Central journal article supplement — Oncol Lett. 2020 Sep 18;20(5):254. doi: 10.3892/ol.2020.12117 (PMC7509765; doi:10.3892/ol.2020.12117), 2020-09-18

Figure S1. Design of the study. GC, gastric cancer; Pre, precancerous lesions; miR, miRNA; CEA, carcinoembryonic antigen; CA, carbohydrate antigen; ROC, receiver operating characteristic.

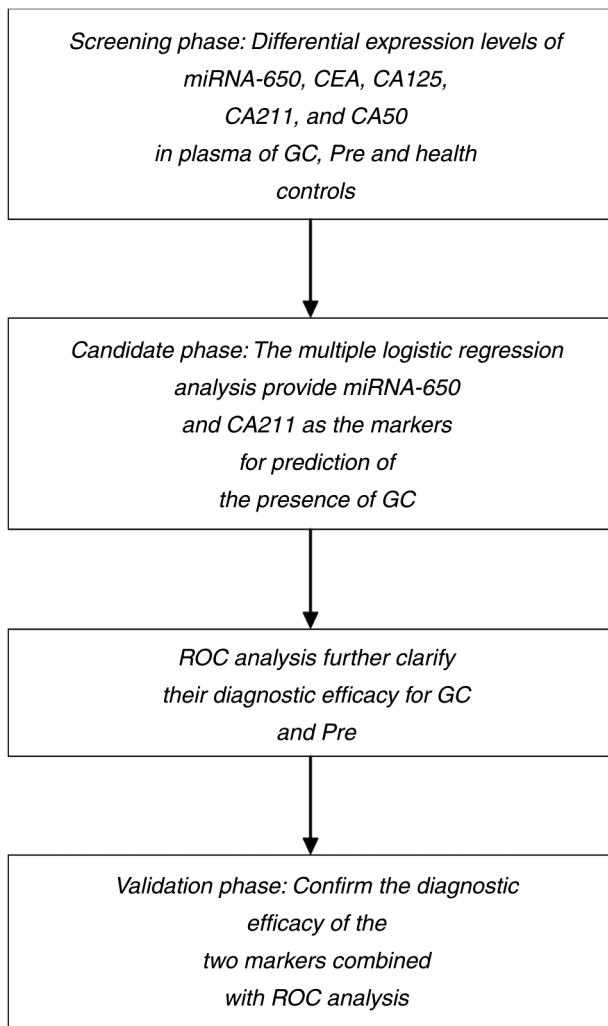

Supplement: Supplementary_Data.pdf [file Supplementary_Data.pdf]
